# Supplementary material for: Revisited and revalorized: Technological and refitting studies at the Middle Stone Age open-air knapping site Jojosi 1 (KwaZulu-Natal, South Africa)
Source: Research Square preprint supplement (doi:10.21203/rs.3.rs-4915370/v1), 2024-09-12
Supplement: Supplementary file 1 [file 00860e55c5eb95b0edf97b1f.xlsx]

## Sheet: Tabelle1
Dorsal scar pattern	Flake (n) and share (%)	Blade (n) and share (%)	Bladelet (n) and share (%)	Summed total (n)	Share of total (%)
unidirectional convergent	7 (2.8%)	1 (2.6%)	1 (5.6%)	9	0.029
unidirectional parallel	117 (46.8%)	16 (42.1%)	12 (66.7%)	145	0.474
bidirectional parallel	32 (12.8%)	12 (31.6%)	4 (22.2%)	48	0.157
orthogonal	72 (28.8%)	2 (5.3%)	0 (0%)	74	0.242
centripetal	3 (1.2%)	1 (2.6%)	0 (0%)	4	0.013
crested	0 (0%)	2 (5.3%)	0 (0%)	2	0.007
fully cortical	11 (4.4%)	4 (10.5%)	1 (5.6%)	16	0.052
indetermined	6 (2.4%)	0 (0%)	0 (0%)	6	0.02
irregular	2 (0.8%)	0 (0%)	0 (0%)	2	0.007
Summed total	250	38	18	306	1
