# Supplementary material for: Revisited and revalorized: Technological and refitting studies at the Middle Stone Age open-air knapping site Jojosi 1 (KwaZulu-Natal, South Africa)
Source: Research Square preprint supplement (doi:10.21203/rs.3.rs-4915370/v1), 2024-09-12
Supplement: Supplementary file 2 [file 1aa45a6684004fcc6e8d5ba0.xlsx]

## Sheet: Tabelle1
Transect (both units)	Flakes (n)	Blades (n)	Bladelets (n)	Indetermined (n)	Summed total (n)
0-10 cm	20	4	0	0	24
10-20 cm	26	1	1	0	28
20-30 cm	21	4	0	0	25
30-40 cm	28	2	2	0	32
40-50 cm	26	3	0	0	29
50-60 cm	122	21	10	1	154
60-70 cm	164	19	11	0	194
70-80 cm	58	7	1	0	66
80-90 cm	68	17	5	0	90
90-100 cm	90	12	10	0	112
100-110 cm	29	3	0	0	32
110-120 cm	8	2	1	0	11
120-130 cm	10	2	0	1	13
Summed total (n)	670	97	41	2	810
Share of total	0.827	0.12	0.051	0.002	1
x̅ (n)	51.5	7.5	5.1	0.2	62.3
σ (n)	45.8	6.9	4.2	0.4	56.2
