# Supplementary material for: Revisited and revalorized: Technological and refitting studies at the Middle Stone Age open-air knapping site Jojosi 1 (KwaZulu-Natal, South Africa)
Source: Research Square preprint supplement (doi:10.21203/rs.3.rs-4915370/v1), 2024-09-12
Supplement: Supplementary file 3 [file 46993f6c6ceae5c001e1621b.docx]

# **Supplement 2: Attribute tables**

## a) General Lithic Entry:

| Attribute | Attribute States | Definitions | Unit | Source | Data type |
| --- | --- | --- | --- | --- | --- |
| Inventory number | Integer | Unique, sequentially ascending number (integer) | NA | - | - |
| Excavation unit | Upper slope, Lower Slope | Indicator for the association with the original excavation context | NA | Mazel 1991 (unpublished, excavational documentation) | Categorical |
| Excavation transect | 0-10 cm, 10-20 cm, …, 130-130 cm | Assignment of locality of origin during excavation, defined in 10 cm stripes of a single, horizontally extending unit excavated as one layer | NA | Mazel 1991 (unpublished, excavational documentation) | Categorical |
| Weight | Numeric | the physical mass of an object measured by a calibrated scale | g | - | Ratio |
| Maximum dimension | Integer | measured between the two most distant  points of the lithic artifact | mm | Shea 2013, 341-342 | Ratio |
| (Hypothetical) Technological maximum length | Integer or NA if broken | measured from the point of impact to the opposite point on the distal end along the line of fracture propagation that is orthogonal to the width of the striking platform.  For Cores: Maximum Dimension measured along the direction of major removals | mm | Tostevin 2012, 133; Shea 2013, 341-342; Andrefsky 2008, 99 | Ratio |
| Technological maximum width | Integer or NA if broken | the longest dimension orthogonal to the axis of the maximum technological length | mm | Tostevin 2013, 133; Schea 2013, 341-342; Andrefsky 2008, 100-101 | Ratio |
| Technological maximum thickness | Integer or NA if broken | the longest dimension orthogonal to the plane defined by the intersection of technological length and width | mm | Schea 2013, 341-342 | Ratio |
| Find category | blank, core, tool, angular debris, unmodified manuport | Trichotomy of cores, debitage products, and anthropogenically modified/retouched pieces, furthermore, transported but unmodified pieces and unidentifiable but flaked pieces (=angular debris). | NA | Inizan et al. 1999, 95; Tryon 2013, 105; Tostevin 2012, 93–94 | Categorical |
| Raw material | Hornfels, Chert, Dolerite, Basalt, Quartz, Quartzite, Sandstone, … | *De visu* identification by physical properties such as luster, transparency, texture, inclusions, and color (Munsell) | NA | Botha 1996, 139; Grotzinger and Jordan 2016, 66–71 | Categorical |
| Raw material variety | HF1, HF2, HF3, … | *De visu* identification of raw material varieties according to their physical properties as stated above | NA | Botha 1996, 139; Grotzinger and Jordan 2016, 66–71 | Categorical |
| Cortex Total | 0-100, in distinct 10% intervals | Amount of coverage of the total surface with cortex | % | Andrefsky 2008, 104-105; Tostevin 2012, 128–129) | Interval |
| Cortex type | Cobble (nodular), slab (tabular), rounded (fluviatile), irregular, indetermined | Physical, geometrical shape of naturally occurring raw material blanks and possible geomorphological alterations | NA | Andrefsky 2008, 104-105; Tostevin 2012, 128–129 | Categorical |
| Cortex variety | A, B, C, D, … | Distinct, *de visu* identifiable manifestations of shape, color, and alterations of cortical surfaces that could indicate raw material units suitable for refitting studies | NA | Andrefsky 2008, 104-105; Tostevin 2012, 128–129 | Categorical |
| Taphonomy | Rounded, potlids, heat fractures, patina, edge damage (=use wear), modern edge damage | Physical alterations of the surface of an artifact, either by natural or anthropogenic processes such as wind, temperature, use, or excavation | NA | Hahn 1991, 33-55 | Categorical |
| Level of rounding | Mint, very fresh, fresh, slight abrasion, abraded, heavily abraded, extreme abrasion | Distinction based on ridge width, surface alteration, and edge alteration | NA | Bustos-Perez et al. 2019, 1272 | Categorical |

## b) Blanks

| Attribute | Attribute States | Definitions | Unit | Reference | Data type |
| --- | --- | --- | --- | --- | --- |
| Preservation/ Completeness | Complete, Proximal, Medial, Distal, Lateral, Proximal-Medial, Distal-Medial, Proximal-Lateral, Distal-Lateral | Specification of the preservation of distal, proximal or lateral areas of the artifact | NA | Andrefsky 2008, 87-89;  Shea 2013, 338 | Categorical |
| If Broken, Type of break | Siret, Bending, Compression, undetermined, NA | Siret breaks are accidental, longitudinal breaks along striking direction originating at the point of fracture initiation, while bending and compression breaks occur mostly transversally  NA = Not broken | NA | Cotterell & Kamminga 1987, 691-695; Inizan 1999, 34, 156; Jennings 2011; McBrearty et al. 1998; Pargeter et al. 2012 | Categorical |
| Type of Blank | Flake, Blade, Bladelet, Point, Undetermined | Flake: Length/Width Ratio lower than 2:1  Blade: Length/Width Ratio equal or larger than 2:1,  Bladelet: Blade under 12 mm width and 50 mm length  Point: triangular, convergent shape | NA | François Bordes 1961, 16; Hahn 1991, 69; Inizan et al. 1999, 130–131; Tixier 1963, 35–39; Tarrino 2005, Shea 2013, Tostevin 2013 | Categorical |
| Dorsal surface cortex amount | 0-100, in distinct 10% intervals | Coverage of the dorsal face with cortex in 10% intervals | % | Tostevin 2013, 129 | Interval |
| Dorsal Cortex surface position | All cortical, partially distal, partially right lateral, partially left lateral, proximal, medial | Multiple selections possible | NA | Shea 2013, 338–339 | Categorical |
| Bulb morphology | Strong developed, developed, poor developed, not developed, NA | Level of pronunciation of the bulb, considered flat and diffuse bulb (=poor developed) as specified for antler and soft stone hammer percussion and pronounced and wide (= strong developed) as specified for hard stone hammer percussion  NA = Broken or retouched, proximal part not preserved | NA | Andrefsky 2008, 118-120;  Pelegrin 2000, 76-79;  Cotterell and Kamminga 1987, pp. 686–687;  Soriano et al. 2007, 686 | Categorical |
| Bulbar features | Shattered, Bulb scar, Hertzian Cone, Lip, Point of contact, Ripple lines, None, NA | Technological observations related to fracture initiation.  NA = Broken or retouched, proximal part not preserved | NA | Pelegrin 2000, 74-79; Cotterell & Kaminga 1987, 686-689  Andrefsky 2008, 118-120 | Categorical |
| Platform preservation | Complete, over 50%, under 50% | Estimated percentage of completeness, indicative of evaluability of several attributes | NA |  | Interval |
| Type of platform | Cortical, plain, dihedral, facetted, punctiform, liniform, crushed, removed, NA | Plain: platform composed of one negative  Dihedral: platform composed of two negatives  Facetted: platform composed of three or more negatives  Punctiform: circular, less than 2 mm diameter  Liniform: line-shape, less than 2 mm thickness  NA: Broken pieces, proximal end not preserved | NA | Inizan 1999, 134; Shea 2013, 338; Tostevin 2013, 125 | Categorical |
| Platform width | Numeric | Measured between the two most distant  points on the striking platform along the plane defined by the  intersection of the dorsal and ventral surfaces and perpendicular to the platform thickness | mm | Shea 2013, 341-342; Tostevin 2013, 126;  Dibble and Rezek 2009, 1949 | Ratio |
| Platform thickness | Numeric | Measured between the point of impact at the ventral face and  and the intersection of the striking platform and dorsal surface | mm | Shea 2013, 341-342; Tostevin 2013, 126;  Dibble and Rezek 2009, 1949 | Ratio |
| External Platform Angle | Numeric | Angle between the platform surface and the dorsal face at the point of fracture initiation | ° | Shea 2013, 341; Tostevin 2013, 126; Dibble and Rezek 2009, 1949 | Ratio |
| Curvature | Convex, straight, concave, twisted, NA | Shape along the technological axis, the state curved (convex/concave) is assigned when the curvature measurement exceeds 1/8 of the blank’s maximum technological length  NA = broken | NA | Tostevin 2013, 134 | Categorical |

| Attribute | Attribute States | Definitions | Unit | Reference | Data type |
| --- | --- | --- | --- | --- | --- |
| Blank cross-section | triangular, right-triangular, trapezoidal, lenticular, domed, indetermined | triangular: one ridge  right-triangular: one vertical lateral edge, one ridge  trapezoidal: two or more ridges  lenticular: no dorsal ridges  domed: multiple ridges, strongly convex  undetermined: broken, retouched, or highly irregular | NA | Tostevin 2013, 134–135 | Categorical |
| Flake Termination | Feather, Hinge, Plunging, Step, NA | Feather: < 90° angle between ventral/dorsal faces  Hinge: > 90° angle between ventral/dorsal faces with a strong curve  Plunging: > 90° angle between ventral/dorsal faces, distally removing a substantial part of the core volume or edge  Step: ~ 90°, only recorded if securely complete  NA: Broken | NA | Cotterell & Kamminga 1987, 684, 698-701; Inizan 1999, 36; Shea 2013, 340-341 | Categorical |
| Dorsal surface step scars | Integer | Number of negatives on the dorsal face that terminate with a step fracture (=knapping accident) as a parameter for the knapping proficiency | NA | Cotterell & Kamminga 1987, 700-701; Toth et al. 2006, 166 | Nominal |
| Dorsal surface hinge scars | Integer | Number of negatives on the dorsal face that terminate with a hinge fracture (=knapping accident) as a parameter for the knapping proficiency | NA | Cotterell & Kamminga 1987, 700-701; Toth et al. 2006, 166 | Nominal |
| Direction A Number of dorsal Negatives | Integer | All negatives > 0.5 cm from the distal direction | NA | Tostevin 2013, 127 | Nominal |
| Direction B Number of dorsal Negatives | Integer | All negatives > 0.5 cm from the right lateral direction | NA | Tostevin 2013, 127 | Nominal |
| Direction C Number of dorsal Negatives | Integer | All negatives > 0.5 cm from the proximal direction | NA | Tostevin 2013, 127 | Nominal |
| Direction D Number of dorsal Negatives | Integer | All negatives > 0.5 cm from the left lateral direction | NA | Tostevin 2013, 127 | Nominal |
| Dorsal Scar pattern | unidirectional parallel, unidirectional convergent, Bidirectional parallel, Orthogonal, Centripetal, Crested, Irregular, fully cortical, Undetermined | Unidirectional parallel: negatives only from Sector A  Unidirectional-convergent: >3 negatives only from Sector C, B, and D spanning a total angle of a maximum of 45°  Bidirectional parallel: >2 negatives only from Sector C and A  Orthogonal: >2 negatives from Sector C and B or D  Centripetal: >4 from all sectors, converging in the center  Crested: negatives from B and D, forming an acute angled guiding ridge in the center of the dorsal face  Fully cortical: No flake scars  Irregular: from multiple directions without clear orientation  Undetermined: directions of scars not recognizable e.g., due to broken artifact | NA | Tostevin 2013, 127; Shea 2013, 339 | Categorical |
| Knapping technique | Handheld, Bipolar | The dichotomy of knapping techniques is identifiable by characteristics such as an increased number of negatives at the proximal and distal end on both ventral and dorsal faces (splintered opposite edges, opposed dorsal negatives, siret fractures, absence of bulbular features etc.). | NA | Diez Martin et al. 2011, De la Pena 2015, Pargeter & Eren 2017 | Categorical |
| Flake Technological  Typology | non-diagnostic flake, core tablet, partial core tablet, plunging, preferential Levallois flake, Levallois point, débordant, debordant à dos limité, retouch flake, unifacial shaping flake, bifacial shaping flake, Kombewa flake, burin spall, NA | Non-diagnostic flake: complete but falls outside of the categories listed below, without distinct technological traits  Core tablet: orthogonally to main reduction direction detached rejuvenation flake of a core removing the prior striking platform  Plunging: > 90° angle between ventral/dorsal faces at the distal end, detaching a substantial part of the core volume or edge  Preferential Levallois flake: Predetermined flake whose detachment is guided by preparational negatives from a Levallois method, e.g. centripetal or bidirectional, flaked parallel to the intersection of the two surfaces  Levallois point: Predetermined, convergent point whose detachment is guided by preparational negatives from a Levallois method, e.g. centripetal or bidirectional, flaked parallel to the intersection of the two surfaces  Débordant: Preparatory flake that accesses and exploits the core edge, laterally exhibiting a back that preserves cortical surfaces or displays one or more negatives of the reduction or preparation surfaces of the core  Débordant à dos limité: core edge flake that laterally retains parts of the core edge but not on the entire length of its edge and a technological axis that shows a substantial divergence from their morphological axis and thus results in an asymmetrical shape of the flake  Retouch flake: Often convex flakes exhibiting a series of retouch negatives on their dorsal face (unifacial) and/or on their striking platform (bifacial)  Unifacial/bifacial shaping flake: Morphologically distinct flakes, as defined by Soriano et al. 2009, that evidence the uni- or bifacial surface shaping of artifacts such as points by often exhibiting narrow linear platforms, lips on the ventral face, frequent curvature, and previous removals on the dorsal face  Kombewa flake: Often circular or oval flake detached from the convex ventral face of a flake and thus exhibiting no dorsal ridges and an oval cross-section  Burin spall: Originating from the burin blow technique that detaches mostly elongated flakes or blades along a prepared or unprepared edge of a burin core, resulting in a triangular spall  NA=Broken | NA | Andrefsky 2005, 125, 165; Boëda 1990; Boëda 1995, Meignen 1996, 454-455; Inizan 1999; Soressi and Geneste 2011, 342–344; Soriano et al. 2009, 45; Shea 2013; Bustos-Perez et al. 2022 | Categorical |
| Blade Technological Typology | A1, A2, A3, B1, B2, B3, B4, B5, B6, B7, B8, B9, B10, B11, B12, B13, B14, C1, C2, D1, D2, E1 | A: Initial stage  A1: Crested blades with one or two prepared versants  A2: Entirely cortical blades  A3: Blades with more than 50% of cortex (or natural surface)  B: Main production phase  B1: Blades produced during the optimal phase of the debitage, without cortex, with unidirectional or bidirectional scars  B2: Blades with distal cortical edge  B3: Plunging blades preserving a portion of the opposite striking  platform, and unidirectional or bidirectional scars  B4: Plunging blades preserving a portion of the opposite cortical end, and unidirectional or bidirectional scars  B5: Blades directly underlying a crested blade with symmetrical or asymmetrical section and unidirectional or bidirectional scars  B6: Blades with a lateral cortical edge (less than 50% of cortex) and unidirectional or bidirectional scars  B7: Blades with a cortical or natural steep back and unidirectional or bidirectional scars  B8: Blades with a lateral and distal cortical edge (less than 50% of cortex)  B9: Blades with centripetal dorsal scars on one side  B11: Plunging blades of type B4 þ B6 (blades with a lateral cortical  edge and plunging on a cortical end)  B12: Plunging blades of type B4 þ B7 (blades with a cortical steep back and plunging on a cortical end)  B13 Plunging blade of type B3 þ B6 (blades with a lateral cortical edge and plunging on a portion of the opposite striking platform)  B14 Plunging blade of type B3 þ B7 (blades with a cortical steep back and plunging on a portion of the opposite striking platform)  C: Core maintenance blades  C1 Crested blade of second generation (crest along the midline of the blade)  C2: Crested blade of second generation (crest in lateral position)  D: Other  D1: Generic crested blades (that cannot be classed as first or second-generation)  D2: Blades that fall outside any of the listed categories  E: Indeterminate blades  E1: Unclassifiable pieces because of damage, breakage, or irregular raw material | NA | Soriano et al. 2007, 685-688 | Categorical |

## c) Cores:

| **Attribute** | **Attribute States** | **Definitions** | **Unit** | **Reference** | **Data type** |
| --- | --- | --- | --- | --- | --- |
| Taxonomy | Parallel, Platform, Inclined, Multidirectional, Bipolar, Core on flake, Preform, Indetermined broken, other | As stated in Conard et al. 2004 | NA | Conard et al. 2004, 13; Schmidt et al. 2016, 166;  Schea 2013, 28 | Categorical |
| Typology | Discoid, Levallois, Blade, Broken, Undetermined, NA | As stated in Conard et al. 2004 and Boëda 1995  NA = no underlying typology applicable | NA | Boëda et al. 1995, 54; Richter 2019, 235 | Categorical |
| If Levallois core: Reduction scheme | L1, L2, … L8, undetermined, NA | L1 = Single preferential flake  L2 = Unidirectional parallel  L3 = bidirectional parallel  L4 = Unidirectional convergent repeated removals  L5 = Unidirectional convergent for Levallois points  L6 = Bidirectional for Levallois points  L7 = Orthogonal for repeated removals  L8 = Centripetal for repeated removals  NA = No Levallois core | NA | Boëda et al. 1995; Richter 2018, 235 | Categorical |
| If Platform core: Type | Semi-circumferential, circumferential, narrow-sided, POL, undetermined, NA | NA = no Platform core  POL=Planar-Orthogonal-Linear system | NA | Conard 2004, 15-16;  Bader 2015, 154;  Schmidt et al. 2016, 166 | Categorical |
| If Core on Flake: Removal surface | Ventral, dorsal, Ventral proximal, ventral distal, ventral lateral, dorsal proximal, dorsal lateral, dorsal distal, NA | NA = No core on flake | NA |  | Categorical |
| Morphology of last product | flake, point, blade, bladelet, indetermined | Dominant occurrence of main product, although multiple selection is possible | NA | Conard et al. 2004, 15-16 | Categorical |
| Length of last product | Numeric | Technological maximum length of the last complete negative | mm | Schmidt 2019, 52 | Ratio |
| Width of last product | Numeric | Technological maximum width of the last complete negative | mm | Schmidt 2019, 52 | Nominal |
| Number of striking platforms | Integer |  | NA | Conard et al. 2004, 15-16 | Nominal |
| Orientation of striking platforms | Opposed, adjacent, convergent, orthogonal, |  | NA | Conard et al. 2004, 15-16 | Categorical |
| Number of debitage/ removal surfaces | Integer | Considering a minimum size of flake scars of 0.5cm | Counts | Conard et al. 2004, 15-16; Tostevin 2013, 122 | Nominal |
| Direction of core exploitation / | Parallel unidirectional, convergent unidirectional, parallel bidirectional, parallel undetermined, centripetal, multidirectional/irregular, orthogonal | Verbalization of results from sector analysis, as defined for dorsal scar patterns |  | Tostevin 2013, 126; Douze 2015, 7 | Categorical |
| Core platform angle | Integer | The angle between reduction and striking surface or platform, respectively | ° |  | Ratio |
| Direction A Number of Negatives | Integer | Sectors are oriented by the greatest number of bulbar negatives defining the main reduction surface and direction of core exploitation), while the negatives are considered if they exceed a length of 0.5 cm | NA | Tostevin 2013, 122-123 | Nominal |
| Direction B Number of Negatives | Integer | Clockwise definition of sectors | NA | Tostevin 2013, 122-123 | Nominal |
| Direction C Number of Negatives | Integer | Clockwise definition of sectors | NA | Tostevin 2013, 122-123 | Nominal |
| Direction D Number of Negatives | Integer | Clockwise definition of sectors | NA | Tostevin 2013, 122-123 | Nominal |
| Last operation | Preparation, production, accident | Identification of the last step of the reduction process | NA |  | Categorical |
| Discard reason | Broken, accident, dimension, volume, angle, raw material, indetermined | Indicators such as size, hinge fractures, or raw material failures point toward the underlying reason for the discard of the core | NA |  | Categorical |

## d) Tools

| **Attribute** | **Attribute States** | **Definitions** | **Unit** | **Reference** | **Data type** |
| --- | --- | --- | --- | --- | --- |
| Retouch position | Direct, inverse, alternate, alternating, crossed, bifacial | Direct equals a retouch on the dorsal face, while inverse refers to modifications on the ventral face | NA | Inizan et. al. 1999, 81-87;  Debenath & Dibble 1993, 33 | Categorical |
| Retouch localization | Distal, medial, proximal, lateral right, lateral left | Specification of the location of the retouch relative to the technological axis of the artifact, multiple selections possible | NA | Inizan et. al. 1999, 81-87;  Debenath & Dibble 1993, 33 | Categorical |
| Retouch distribution | Continuous, discontinuous, partial | Relationship of the retouch to its extent on the edge | NA | Inizan et. al. 1999, 81-87; Debenath & Dibble 1993, 33 | Categorical |
| Retouch delineation | Rectilinear, concave, convex, notched, denticulated, irregular | Simplified description of the geometrical shape produced by the retouch | NA | Inizan et. al. 1999, 81-87 | Categorical |
| Retouch extent | Short, long, invasive, covering | Description of the invasiveness of the retouch | NA | Inizan et. al. 1999, 81-87; Debenath & Dibble 1993, 33 | Categorical |
| Retouch angle | Abrupt, semi abrupt, low | Verbalization of the edge angle of the functional edge, considered as abrupt at angles >75° | NA | Inizan et. al. 1999, 81-87; Debenath & Dibble 1993, 33 | Categorical |
| Retouch morphology | Scaled, stepped, sub-parallel, parallel | Description of the placement and relationship of each other potentially superimposing negatives | mm | Inizan et. al. 1999, 81-87;  Debenath & Dibble 1993, 33–34 | Categorical |
| Typology of retouch | Regular, invasive, surface, backed, fine, notched, denticulated steep, splintered, burin, bifacial | Typological classes of retouches that form the basis for typological assignment of the tool type |  | Debenath & Dibble 1993, 33–34 | Categorical |
| Typology of tool | Notch, denticulate, end scraper, side scraper, unifacial point, bifacial point, naturally backed tool, denticulate, notch, etc. | Morphological and typological tool types |  | Debenath & Dibble 1993, 33-38, Conard et al. 2012; Will et al. 2014; Bader et al. 2015 | Categorical |
| Tool class | Formal tool, broken tool, Tongati, Nwedwe, etc. | Overarching techno-functional classes of tools |  | Debenath & Dibble 1993, 33-38, Conard et al. 2012; Will et al. 2014; Bader et al. 2015 | Categorical |
