# Supplementary material for: Revisited and revalorized: Technological and refitting studies at the Middle Stone Age open-air knapping site Jojosi 1 (KwaZulu-Natal, South Africa)
Source: Research Square preprint supplement (doi:10.21203/rs.3.rs-4915370/v1), 2024-09-12
Supplement: Supplementary file 4 [file 487d72945e9cc0bec1e54edf.xlsx]

## Sheet: Tabelle1
Reduction stage	Flake type	n	Share
Initial Stage	Cortical flake	59	0.088
	Cortical flake; plunging flake	6	0.009
	Cortical flake; débordant	5	0.007
Main production phase and core maintenance	Preferential flake	4	0.006
	Core preparation flake	9	0.013
	Débordant	123	0.184
	Débordant à dos limité	33	0.049
	Débordant; plunging flake	12	0.018
	Partial core tablet	1	0.001
	Plunging flake	12	0.018
Other	Non-diagnostic flake	406	0.606
Summed Total		670	1
