# Supplementary material for: Revisited and revalorized: Technological and refitting studies at the Middle Stone Age open-air knapping site Jojosi 1 (KwaZulu-Natal, South Africa)
Source: Research Square preprint supplement (doi:10.21203/rs.3.rs-4915370/v1), 2024-09-12
Supplement: Supplementary file 5 [file 64289312614dfc6300c211c8.xlsx]

## Sheet: Tabelle1
Reduction stage	Blade type	n	Share
Initial stage	A1	2	0.021
	A2	7	0.072
	A3	9	0.093
Main production phase	B1	24	0.247
	B3	4	0.041
	B4	3	0.031
	B6	12	0.124
	B7	12	0.124
Other	D2	3	0.031
Indeterminate blades	E1	21	0.216
Summed total (n)		97	1
