# Supplementary material for: Revisited and revalorized: Technological and refitting studies at the Middle Stone Age open-air knapping site Jojosi 1 (KwaZulu-Natal, South Africa)
Source: Research Square preprint supplement (doi:10.21203/rs.3.rs-4915370/v1), 2024-09-12
Supplement: Supplementary file 6 [file a0fa263c519c906b5f3a2d9c.xlsx]

## Sheet: Tabelle1
	Semi-circum-ferential blade core	Circum-ferential blade core	Levallois bi-directional parallel	Levallois uni-directional parallel	Summed total
Parallel cores	0	0	2	1	3
Platform cores	1	1	0	0	2
Summed total	1	1	2	1	5
