# Supplementary material for: Revisited and revalorized: Technological and refitting studies at the Middle Stone Age open-air knapping site Jojosi 1 (KwaZulu-Natal, South Africa)
Source: Research Square preprint supplement (doi:10.21203/rs.3.rs-4915370/v1), 2024-09-12
Supplement: Supplementary file 7 [file be3d1f119381fbb6fabd003d.xlsx]

## Sheet: Tabelle1
Transect (both units)	Blanks (n)	Cores (n)	Tools (n)	Summed total (n)
0-10 cm	24	0	1	25
10-20 cm	28	0	0	28
20-30 cm	25	0	0	25
30-40 cm	32	1	0	33
40-50 cm	29	0	0	29
50-60 cm	154	0	0	154
60-70 cm	194	1	2	197
70-80 cm	66	1	1	68
80-90 cm	90	0	0	90
90-100 cm	112	0	0	112
100-110 cm	32	1	1	34
110-120 cm	11	0	0	11
120-130 cm	13	0	0	13
Slope	0	1	0	1
Summed total (n)	810	5	5	820
Share of total	0.988	0.006	0.006	1
