# Supplementary material for: Revisited and revalorized: Technological and refitting studies at the Middle Stone Age open-air knapping site Jojosi 1 (KwaZulu-Natal, South Africa)
Source: Research Square preprint supplement (doi:10.21203/rs.3.rs-4915370/v1), 2024-09-12
Supplement: Supplementary file 8 [file e2f3c5482f2dc209b4111601.docx]

# Supplementary Information 3

| **Type of refit** | N | Total share |
| --- | --- | --- |
| Production sequences | 8 | 40.0% |
| Breaks | 9 | 45.0% |
| Modifications | 0 | 0.0% |
| Breaks + production sequences | 3 | 15.0% |
| ***Summed total*** | ***20*** | ***100.0%*** |

**Table S1** Overview of the refit types and their frequency

| **RG** | **Inv. No. of involved artifacts** | **Type of refitting** | **No. of artifacts in RG (n)** |
| --- | --- | --- | --- |
| 1 | 55, 396, 397 | Production sequence | 3 |
| 2 | 111, 460, 461 | Break, Production sequence | 3 |
| 3 | 141, 142 | Break | 2 |
| 4 | 398, 448, 399, 172 | Production sequence | 4 |
| 5 | 247, 774 | Break | 2 |
| 6 | 263, 446 | Production sequence | 2 |
| 7 | 266, 301 | Break | 2 |
| 8 | 333, 334 | Break | 2 |
| 9 | 394, 395 | Break | 2 |
| 10 | 405, 406 | Production sequence | 2 |
| 11 | 458, 459, 462, 463 | Break, Production sequence | 4 |
| 12 | 541, 820 | Production sequence | 2 |
| 13 | 548, 551 | Break | 2 |
| 14 | 566, 567 | Production sequence | 2 |
| 15 | 568, 569, 570 | Break, Production sequence | 3 |
| 16 | 624, 625 | Break | 2 |
| 17 | 651, 652 | Break | 2 |
| 18 | 655, 654, 653 | Production sequence | 3 |
| 19 | 762, 763 | Production sequence | 2 |
| 20 | 793, 796 | Break | 2 |
| ***Summed total (n)*** | |  | ***48*** |
| ***Share of total artifacts*** | |  | ***5.9%*** |
| ***Arithmetic mean (n)*** | |  | ***2.4*** |
| ***Standard Deviation (n)*** | |  | ***0.7*** |

***Table S2*** *Comprehensive overview of refitted artifacts in the sampled assemblage with indications of type, number of contained artifacts, refit group, and the respective inventory numbers.*

The first refit group (RG 1) spans a series of three flakes (Inv. No. 396, 397, 55), all partially, right-laterally bearing remnants of a cortical surface (RG 1, Fig. S1 no. 1). The sequence-wise first flake is a plunging flake with a convex curvature that removed parts of the distal core edge and displays negatives of a former bidirectional-parallel reduction from the distal and proximal direction. Two more convex flakes follow it successionally that were unidirectionally knapped from the proximal end of the underlying flake. They subsequently removed more parts of a lateral cortical edge of the core. They decrease in size towards the last element of the production sequence. Their overall position in the reduction process can be located in the early phase of the removal of cortical surfaces heading towards rectangular elongated products such as the last flake. In contrast, the plunging flake could be regarded as a maintenance of the distal convexity of a core or a knapping accident.


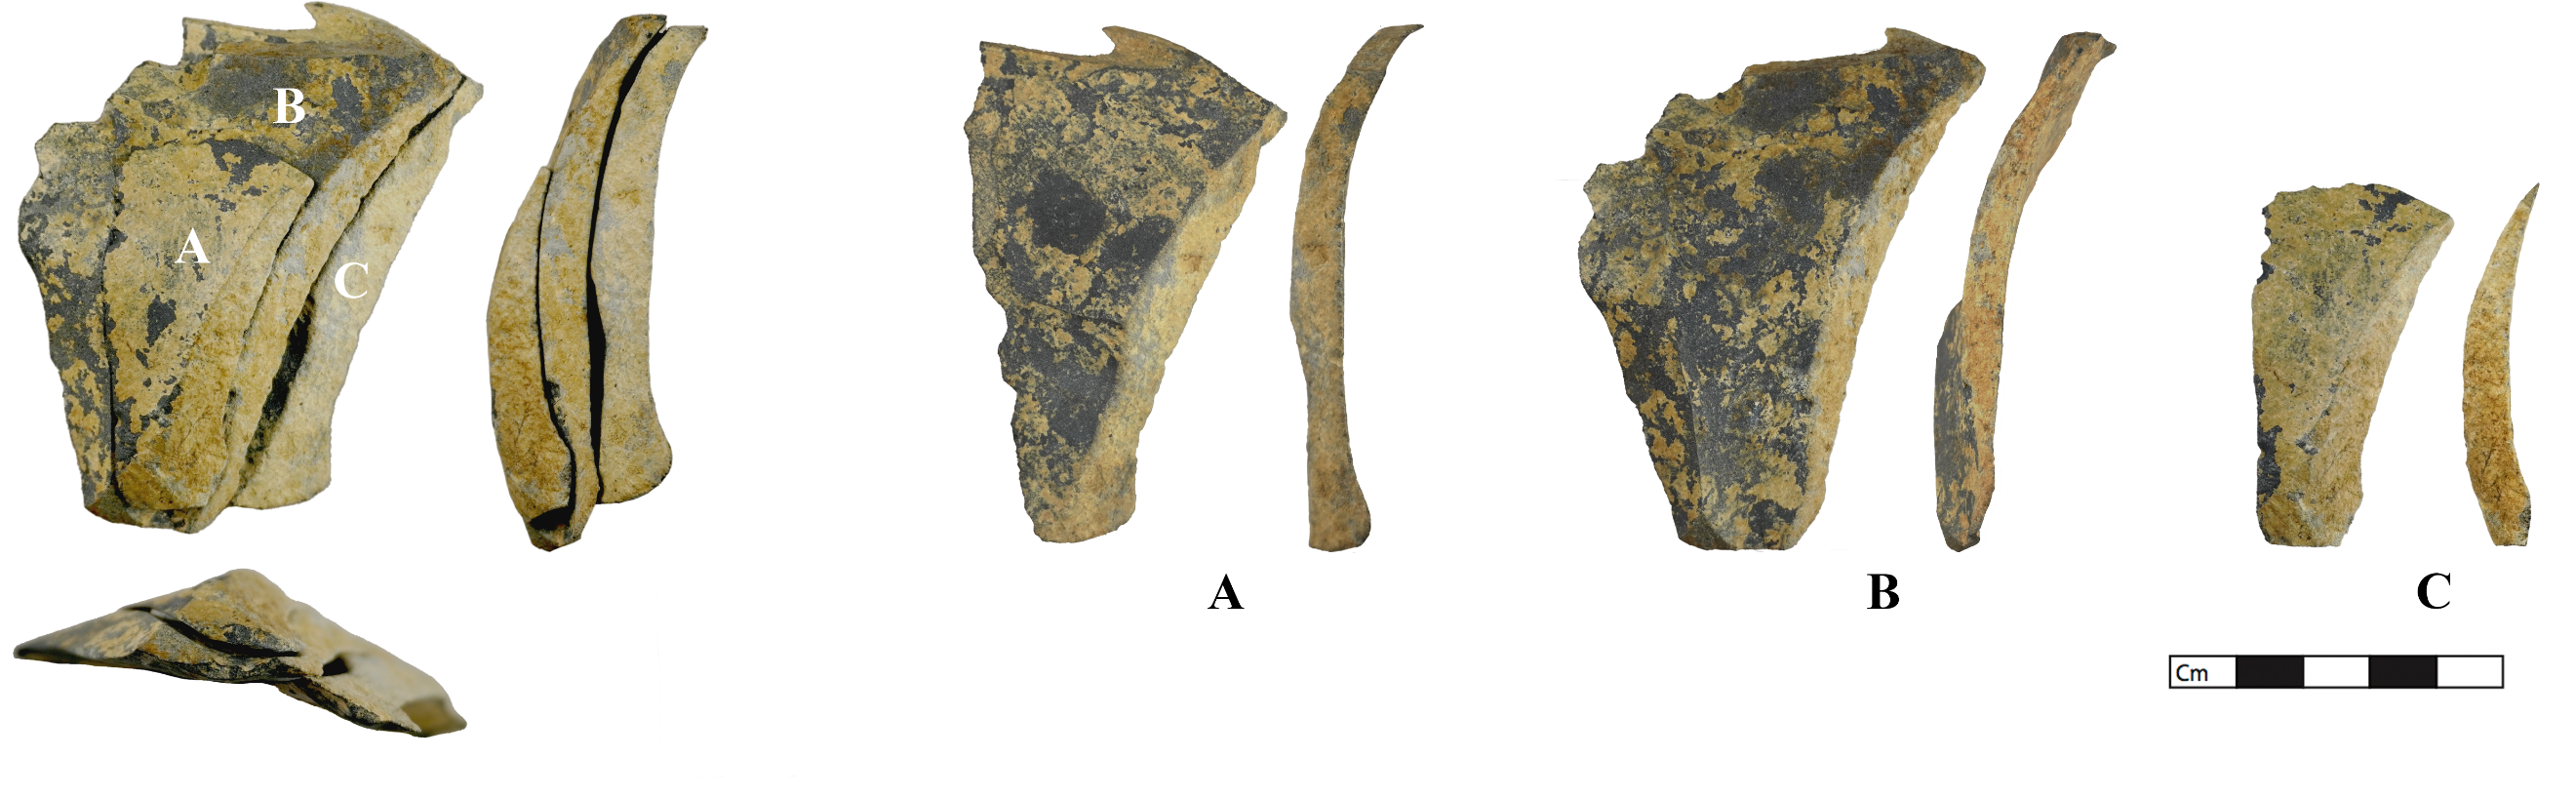


***Fig S1*** *RG 1. (A) Inv. No. 55, plunging débordant flake; (B) Inv. No. 396, plunging débordant flake; (C) Inv. No. 397, flake*

In contrast, refit group 2 combines breaks and production sequences. The conjoining of a distal and a proximal fragment (RG2, Fig. S2 no. 1) of a laminar product with small amounts of cortical surfaces at the right lateral edge led to the identification as an artifact from the main production phase (blade type B6) with unidirectional negatives and a trapezoidal section. It could be directly refitted to the broad face of an unidirectionally exploited platform core with blade negatives (Inv. No. 111). The blade must be assumed as one of the last knapping processes prior to the discard of the core, nevertheless yielding distinct products with a blade morphology. Concerning their spatial location at the site the two broken pieces originate from the same transect and excavation unit (50–60 cm, Outer), whereas the refitted core originates from material from two transects apart (30–40 cm, Inner).


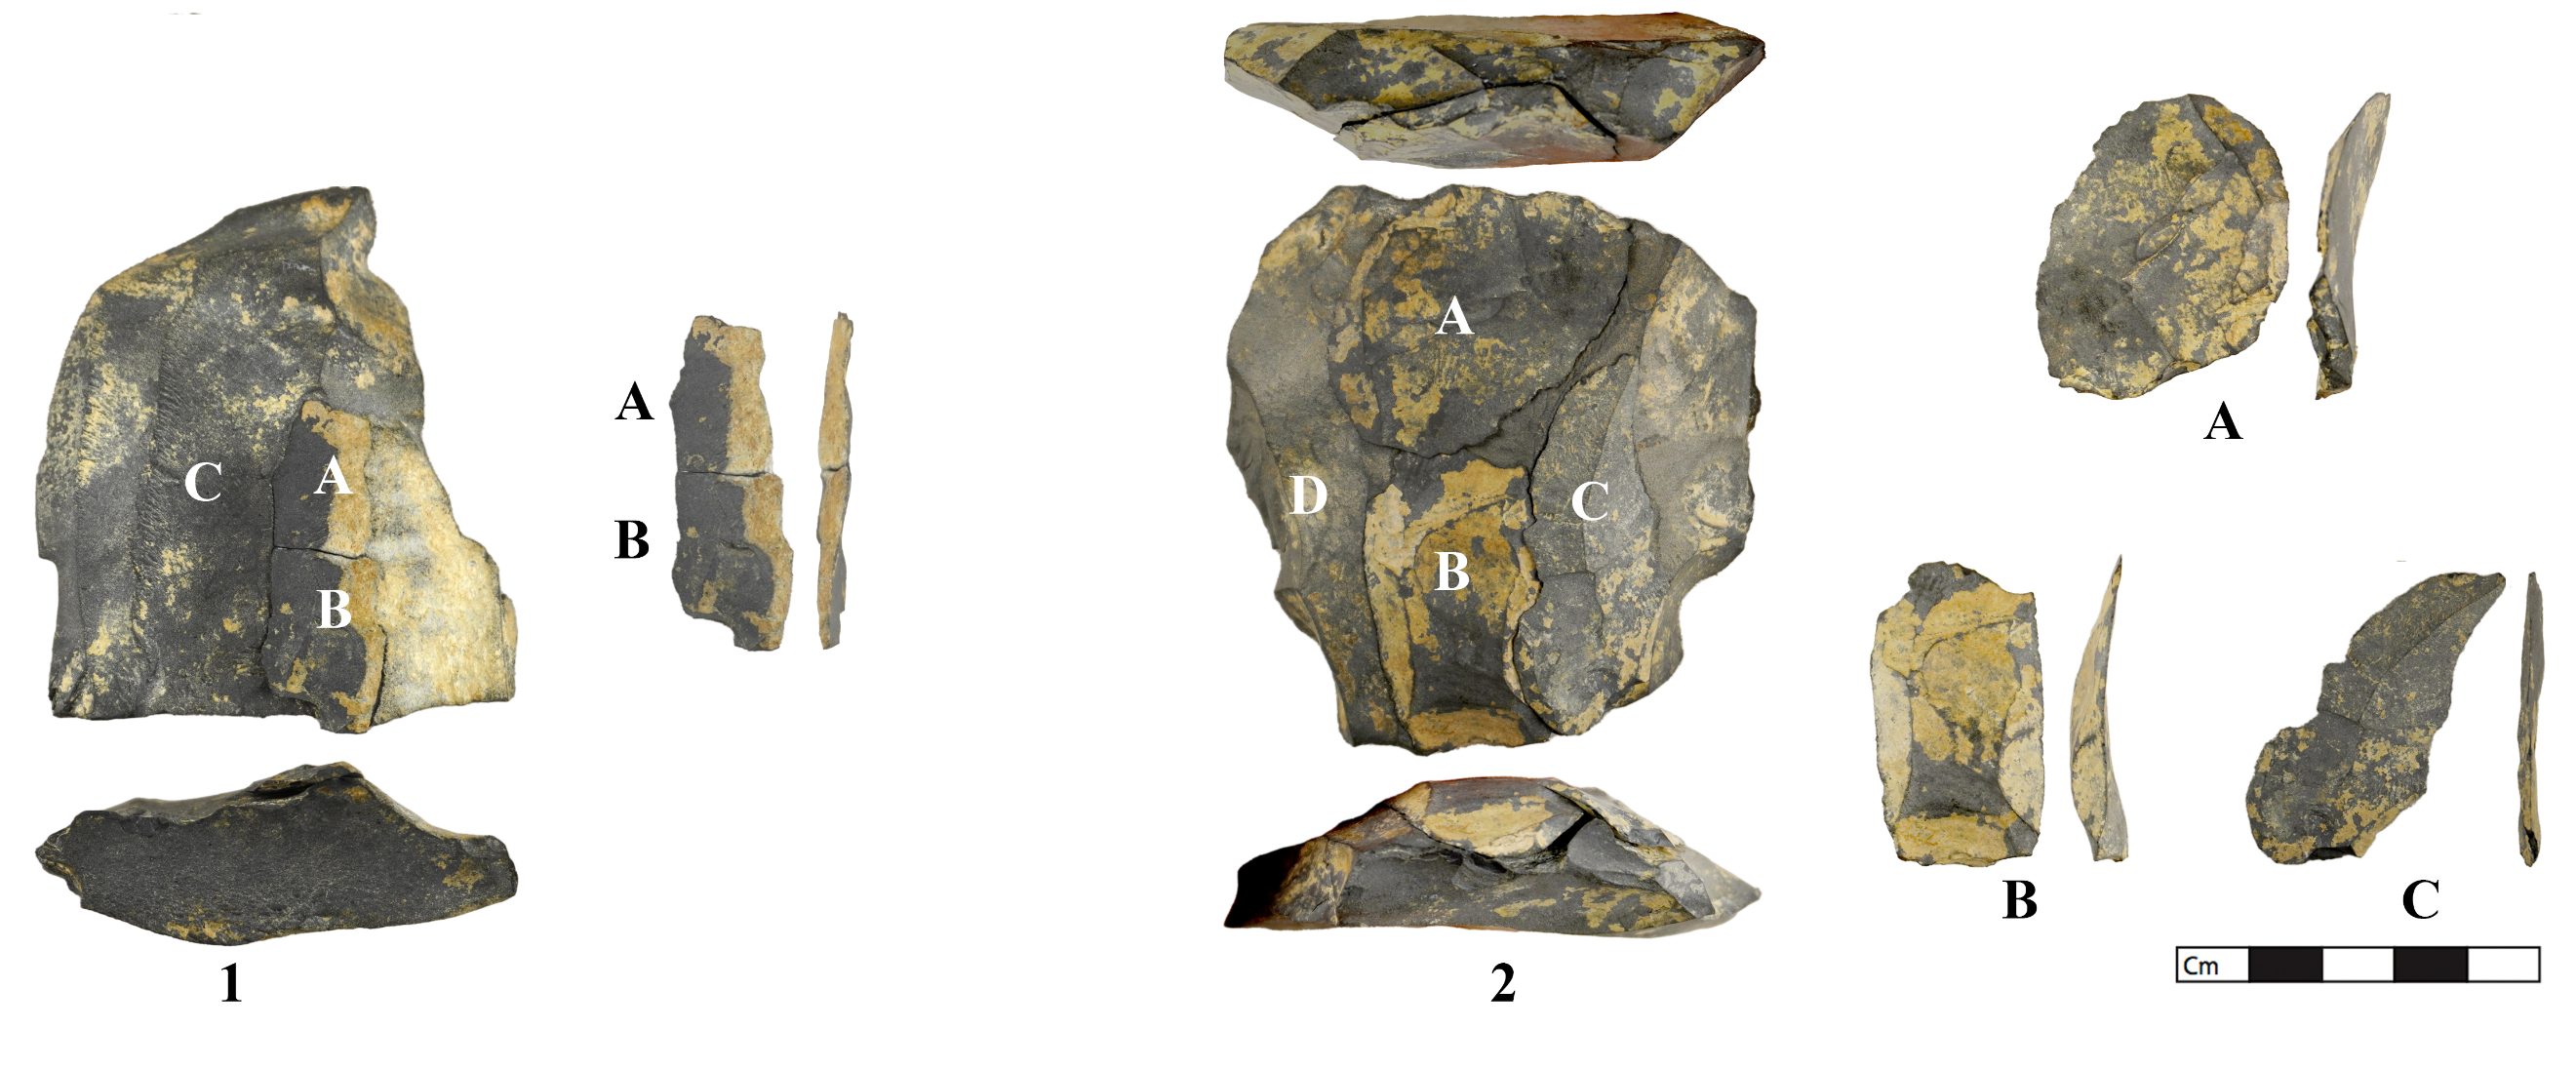


***Fig S2***

*(1) RG 2 ((A) Inv. No. 460, blade fragment; (B) Inv. No. 461, Blade fragment; (C) Inv. No. 111, Platform core) (2) RG 4 ((A) Inv. No. 398, flake; (B) Inv. No. 448, flake; (C) Inv. No. 399, Blade; (D) 172, Levallois core)*

With refit group 4, a production sequence spanning four of the hornfels artifacts evidences a bidirectional reduction scheme on parallel cores during the main production phase. The main element of the sequence is the core (Inv. No 172) from the transect 60–70 cm of the inner excavation area, which, already prior to the refitting study, could be taxonomically and typologically identified as a parallel or Levallois core (RG 4, Fig. S2 no. 2). It exhibits maintenance of the lateral convexities and the distinct detachment of multiple elongated flakes from two opposing directions. The refitted flakes, which all originate from the outer excavation area, span two transects between 60–80 cm and are sequentially knapped in a bidirectional manner. They must be regarded as the last three operations before discarding the core that presumably did not bear enough volume to exploit it further. All of these products evidence a preparation of the striking surface with their facetted butts that match the technological characteristics of the prepared Levallois core edges. Strikingly, the flakes detached from the proximal main direction (Inv. No. 399 and 448) substantially vary in their morphology. One is of irregular shape and originates from a slightly more lateral section of the core upper surface, whereas the prior flake detached from the main area of the reduction surface clearly shows a rectangular elongated shape. The latter morphology presumably represents one of the main properties of preferential Levallois products of flakes and blades. The debitage product from the opposing distal direction (Inv. No. 398) with an oval morphology can also be regarded as an attempt to detach preferential flakes but does not rule out its possible purpose of maintaining a distal convexity of the core.


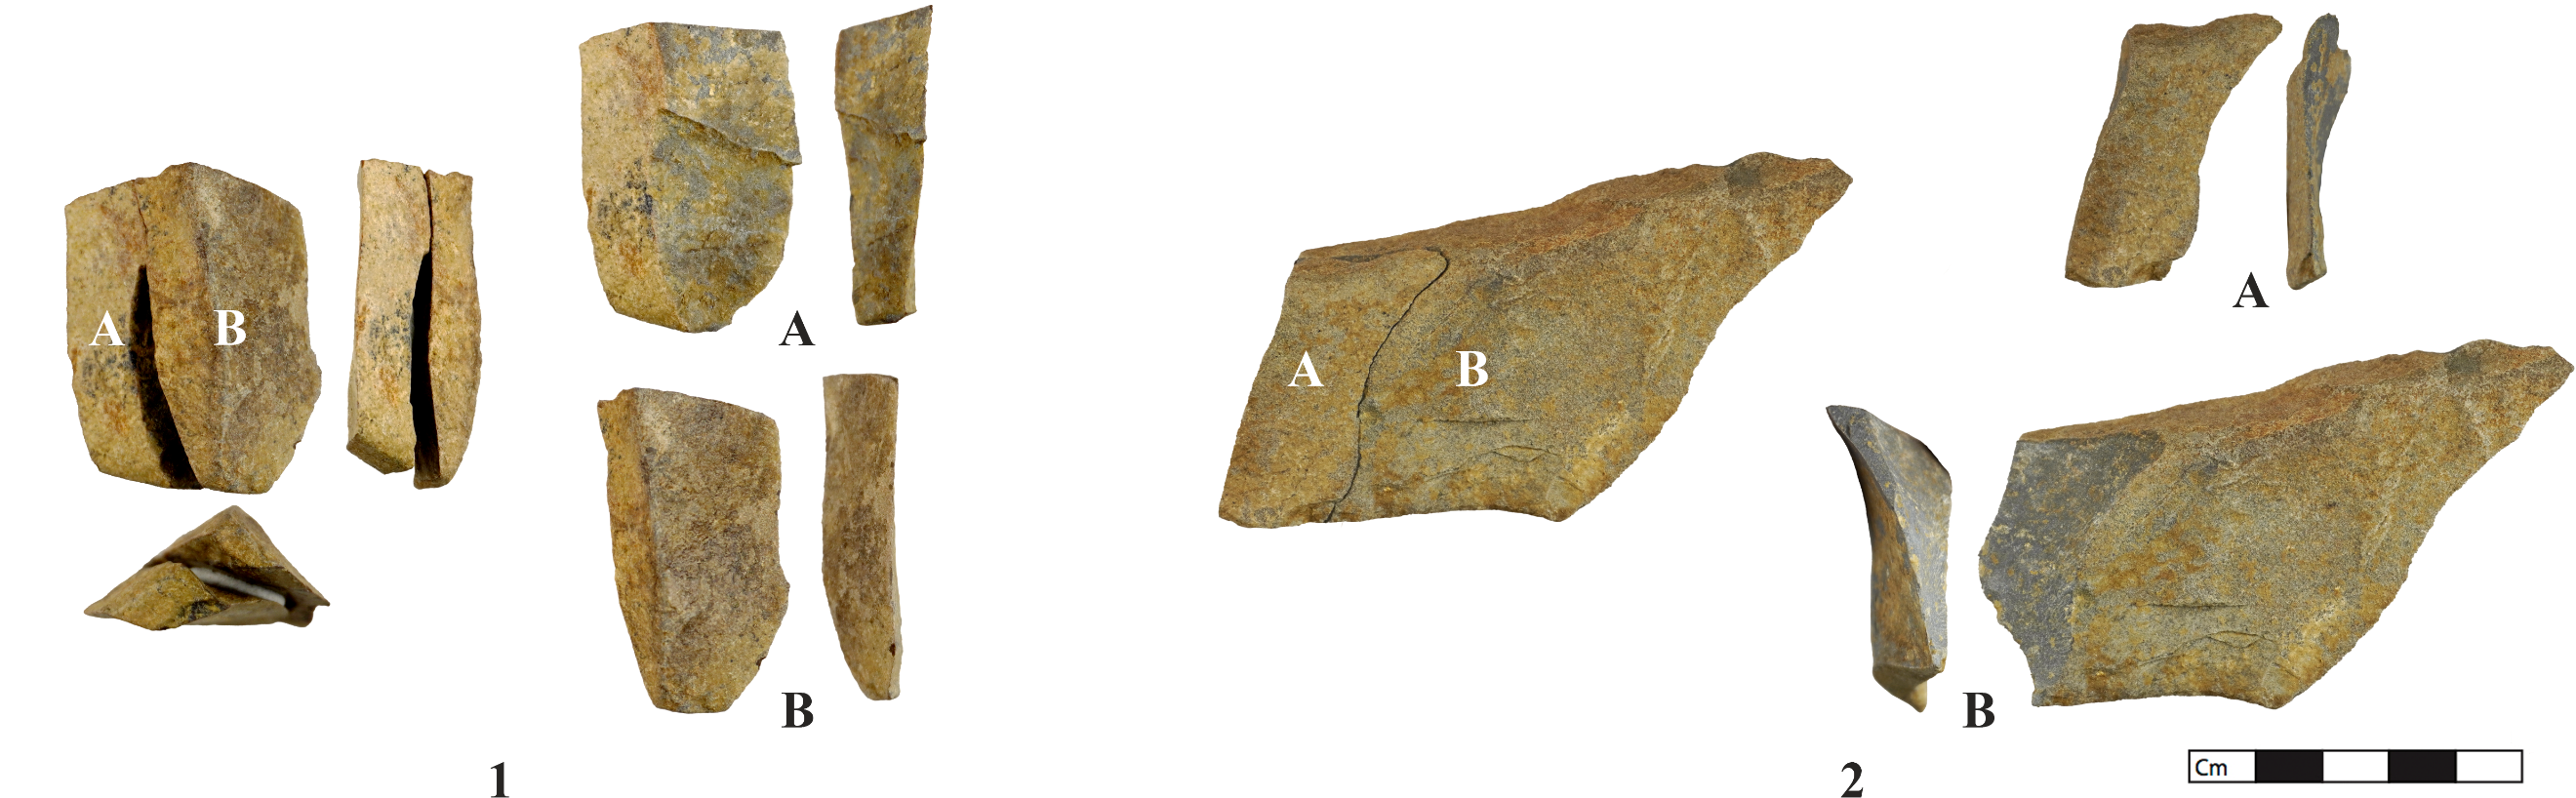


***Fig S3***

*(1) RG 6 ((A) Inv. No. 446, blade fragment (B6) with lateral cortical edge; (B) Inv. No. 263, entirely cortical blade (A2) fragment)*

*(2) RG 10 (A- Inv. No. 405, cortical flake; (B) Inv. No. 406, cortical plunging flake)*

Further reduction sequences, such as RG 6 (Fig. S3.1), represent an early phase in the exploitation of hornfels slabs as the dorsal surfaces of the two involved artifacts from two neighboring transects of the outer excavation area (60–70 cm and 70–80 cm) still bear partial or full, tabular cortical surfaces on their dorsal face, which additionally benefitted the identification of their conjoining during the analysis. Both blanks (Inv. No. 263 and 446), although being proximal-medial fragments lacking their distal part, are identified as laminar products due to their morphology and by the technological-typological classification as an entirely cortical blade (A2) and one blade with a lateral cortical edge (B6). The latter is additionally displaying two unidirectional-parallel negatives. Their position is located in a relatively early reduction stage of raw material decortification according to their level of dorsal surface corticality. This hints towards a preferential reduction system aiming to produce laminar products and exploits natural edges with suitable knapping angles at the beginning. One negative of the underlying blade shows a hinge fracture, indicating a knapping accident that occurred sequentially between the here identified products that share a joint surface. However, the intermediate artifact could not be located in the sampled artifacts of the assemblage.

A comparable refitted sequence of another two entirely or 90% cortical flakes (RG 10, Inv. No 405 and 406) from a different raw material unit is found among the lithic material of the same transect (70-80 cm) in the outer excavation area (Fig. S3 no. 2). They also point toward the working step of decortification of a Hornfels slab with tabular surfaces with a natural angle of 104° between them and once more represent the first steps of preparation of a core. Both flakes exhibit plain platform types, are of an arguably irregular morphology, and likewise removed the distal cortical edge and laterally a part of the former core edge, which allows their identification as débordant flakes from the preparatory phase of the reduction sequence.


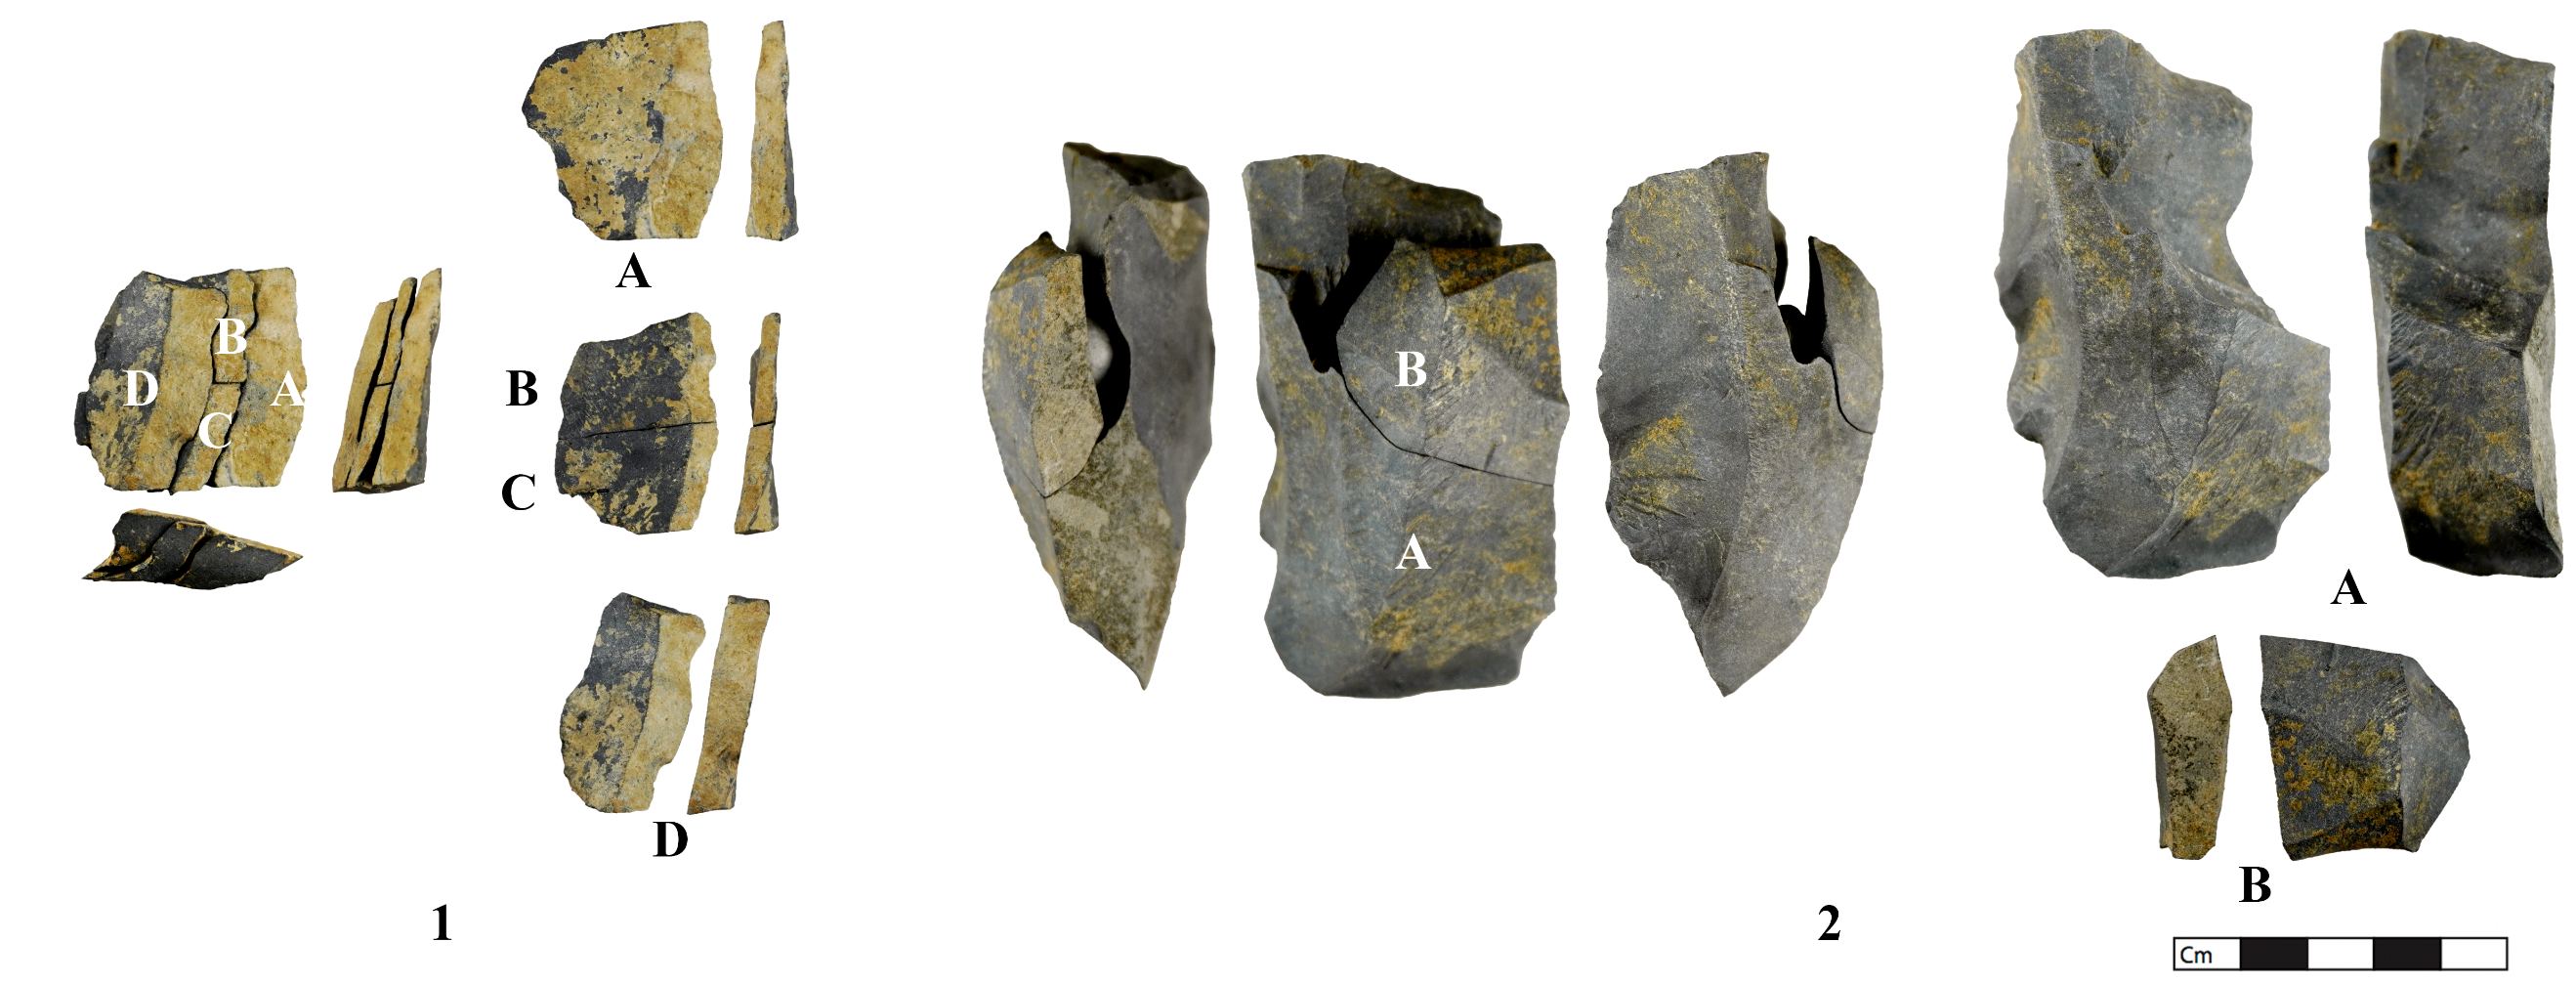


***Fig S4***

*(1) RG 11 ((A) Inv. No. 462, flake fragment; (B) Inv. No. 458, distal flake fragment; (C) Inv. No. 459, proximal flake fragment; (D) Inv. No. 463, flake)*

*(2) RG 12 ((A) Inv. No. 820, Circumferential platform core; B – Inv. No. 541, distal flake fragment with hinge termination)*

In like manner, another refit group (RG11, Fig. S4 no. 1) displays the early reduction stage, whose products still bear significant amounts of cortical surfaces. In the case of RG 11, the artifacts comprise a production sequence of three steps, of which one detached blank was conjoined from a proximal and medial fragment (Break of Inv. No. 458 and 459, refit of 462 and 463). They all originate from the same transect and excavation unit (60–70 cm Outer) and were primarily identified due to their matching and distinct morphology of the right lateral cortical surfaces on their dorsal face. They demonstrate a three-step, unidirectional reduction strategy for the detachment of blanks, presumably during the decortifcation stage of the core reduction. Regarding technological observations, all four flakes are either distally broken or terminate at their distal end with a step fracture, which indicates severe knapping accidents. The three elements of the production sequence furthermore hint towards a lack of platform preparation at the core prior to the detachment of the flakes as all show remnants of a plain striking platform, which most likely fits the working steps during an early core preparation or decortification.

In contrast, refit group 12 (Fig. S4 no. 2) is a production sequence of a significant knapping accident, namely a severe hinge fracture termination of a flake (Inv. No. 541) with a distinct morphology that sparked the brief inspection of surface material from the upper beyond the excavation area. A circumferential platform core (Inv. No. 820) of a darker hornfels raw material variety was found as a directly refitting match from the upper slope. It evidences multiple, sequential hinge fractures that most likely led to the discard of the workpiece. Its deposition within the surface material discovered at the slope beneath the excavation area and the refit flake from the artifact concentration at the outer excavation area of transect 50–60 cm strongly points towards the original integrity of the archaeological feature. Presumably, erosion of the wall and subsequently cutting off parts of the artifact lens led to the downslope movement of the core, which by the refit clearly can be nevertheless associated with the assemblage and hints towards the original spatial integrity of the together deposited artifacts.


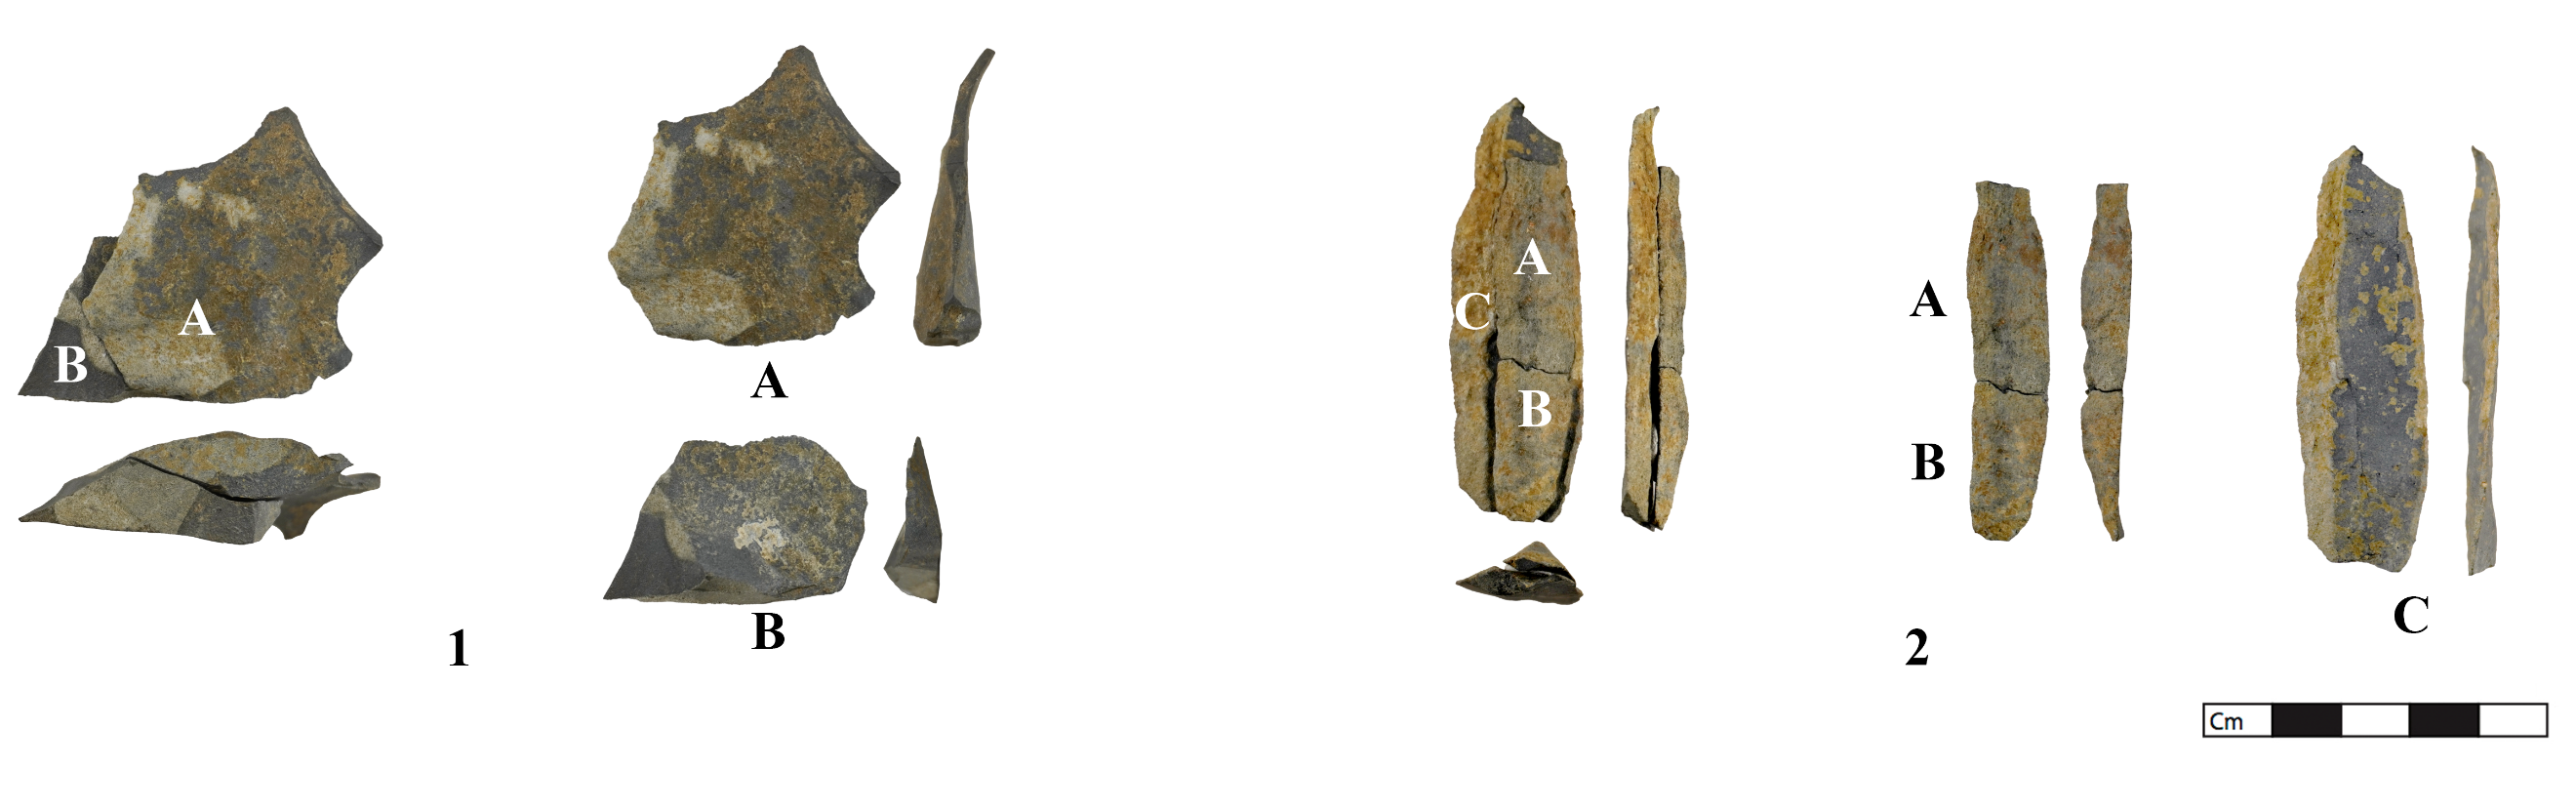


***Fig S5***

*(1) RG 14 ((A) Inv. No. 566, débordant flake fragment; (B) Inv. No 567, flake)*

*(2) RG 15 ((A) Inv. No. 570, cortical blade (A2) fragment; (B) Inv. No. 569, proximal blade (a2) fragment; (C) Inv. No. 568, blade with lateral cortical edge (B6)*

Another short production sequence of two artifacts, RG 14 (Fig. S5 no. 1), from the areas of the highest artifact densities in the excavation area (Outer transect, 50–60 cm) further points towards the processes that occurred at the site, namely decortification and early reduction steps of tabular hornfels slabs. The two sequential flakes (Inv. No. 566 and 567) of a dark raw material variety both bear small amounts (10-20%) of cortical surfaces at the left lateral and proximal position on their dorsal face. In combination with a plain platform remnant on both and an overall irregular morphology, their position in the reduction sequence can be placed within the early steps of the core reduction. Furthermore, the lateral edge of the débordant flake (Inv. No. 566) evidences removing parts of a core edge as preparatory step of the lateral convexities during the knapping process.

Moreover, further artifacts (RG 15, Fig. S5 no. 2) from the same transect (Outer, 50–60 cm) that originate in the first flakes of a cortical raw material piece demonstrate the detachment of laminar blades and the opportunities the starting products with beneficial natural edges offered. Two broken pieces (Inv. No. 569 and 570), a medial and a distal fragment, could be conjoined to a fully cortical A2 blade with a triangular section exhibiting a natural edge in its center line of the dorsal face which likely was used as a leading ridge for its controlled detachment. A slightly larger B6 blade (Inv. No. 568) with cortical edges at both lateral positions follows it sequentially, showing two unidirectional parallel negatives evidencing another, yet shorter laminar product that was chronologically detached between both here identified blades of the production sequence. The approximate 90° angles of the natural surfaces as observed on the broken blade already in the earliest reduction and decortification steps, which allowed the detachment of knapping products with a blade morphology and, complementary to the evidence from the cores, presumably benefitted platform reduction strategies aiming towards laminar products.

Another very distinct production sequence of three blanks (RG 18, Fig. S6 no. 1) was discovered in the material of the outer excavation area in transect 90-100 cm, bordering the main artifact concentration of the feature. With the starting point being a B6 blade from the main production phase (Inv. No. 655) with a right-lateral cortical edge and a unidirectional parallel dorsal scar pattern of three negatives, a series of two flakes (Inv. No. 654 and 653) were sequentially detached after the latter. Strikingly, both flakes, which are unidirectionally knapped from the same striking platform, terminate with hinge fractures and hence evidence of repeated knapping accidents after the formerly successful production of laminar products. They represent debitage from the blank manufacture of the production that was directly carried out at the site, although knapping accidents, as discussed in the analysis of the blanks, appear to be frequently occurring as well.

The last production sequence is refit group 19, comprising two artifacts from the same transect (100–110 cm, Outer). It consists of a direct refit of a broken, distal flake fragment (Inv. No. 763) that has a connecting surface to a parallel core (Inv. No. 762) with a centripetal flake scar pattern displaying a dominantly unidirectional parallel reduction scheme (Fig. S6 no. 2). The exhausted core was most likely discarded due to a severe knapping accident manifested in a hinged flake scar on its upper surface. This distinct morphology of the negative allowed the identification of the fitting flake, which prominently displays the hinge termination and can be confidently identified as the last action carried out on the core. Moreover, the refitted flake, although broken and only preserved in its medio-distal part, exhibits a right lateral core edge, evidencing the striking platform preparation and maintenance of the lateral convexities in the employed unidirectional recurrent Levallois reduction method.


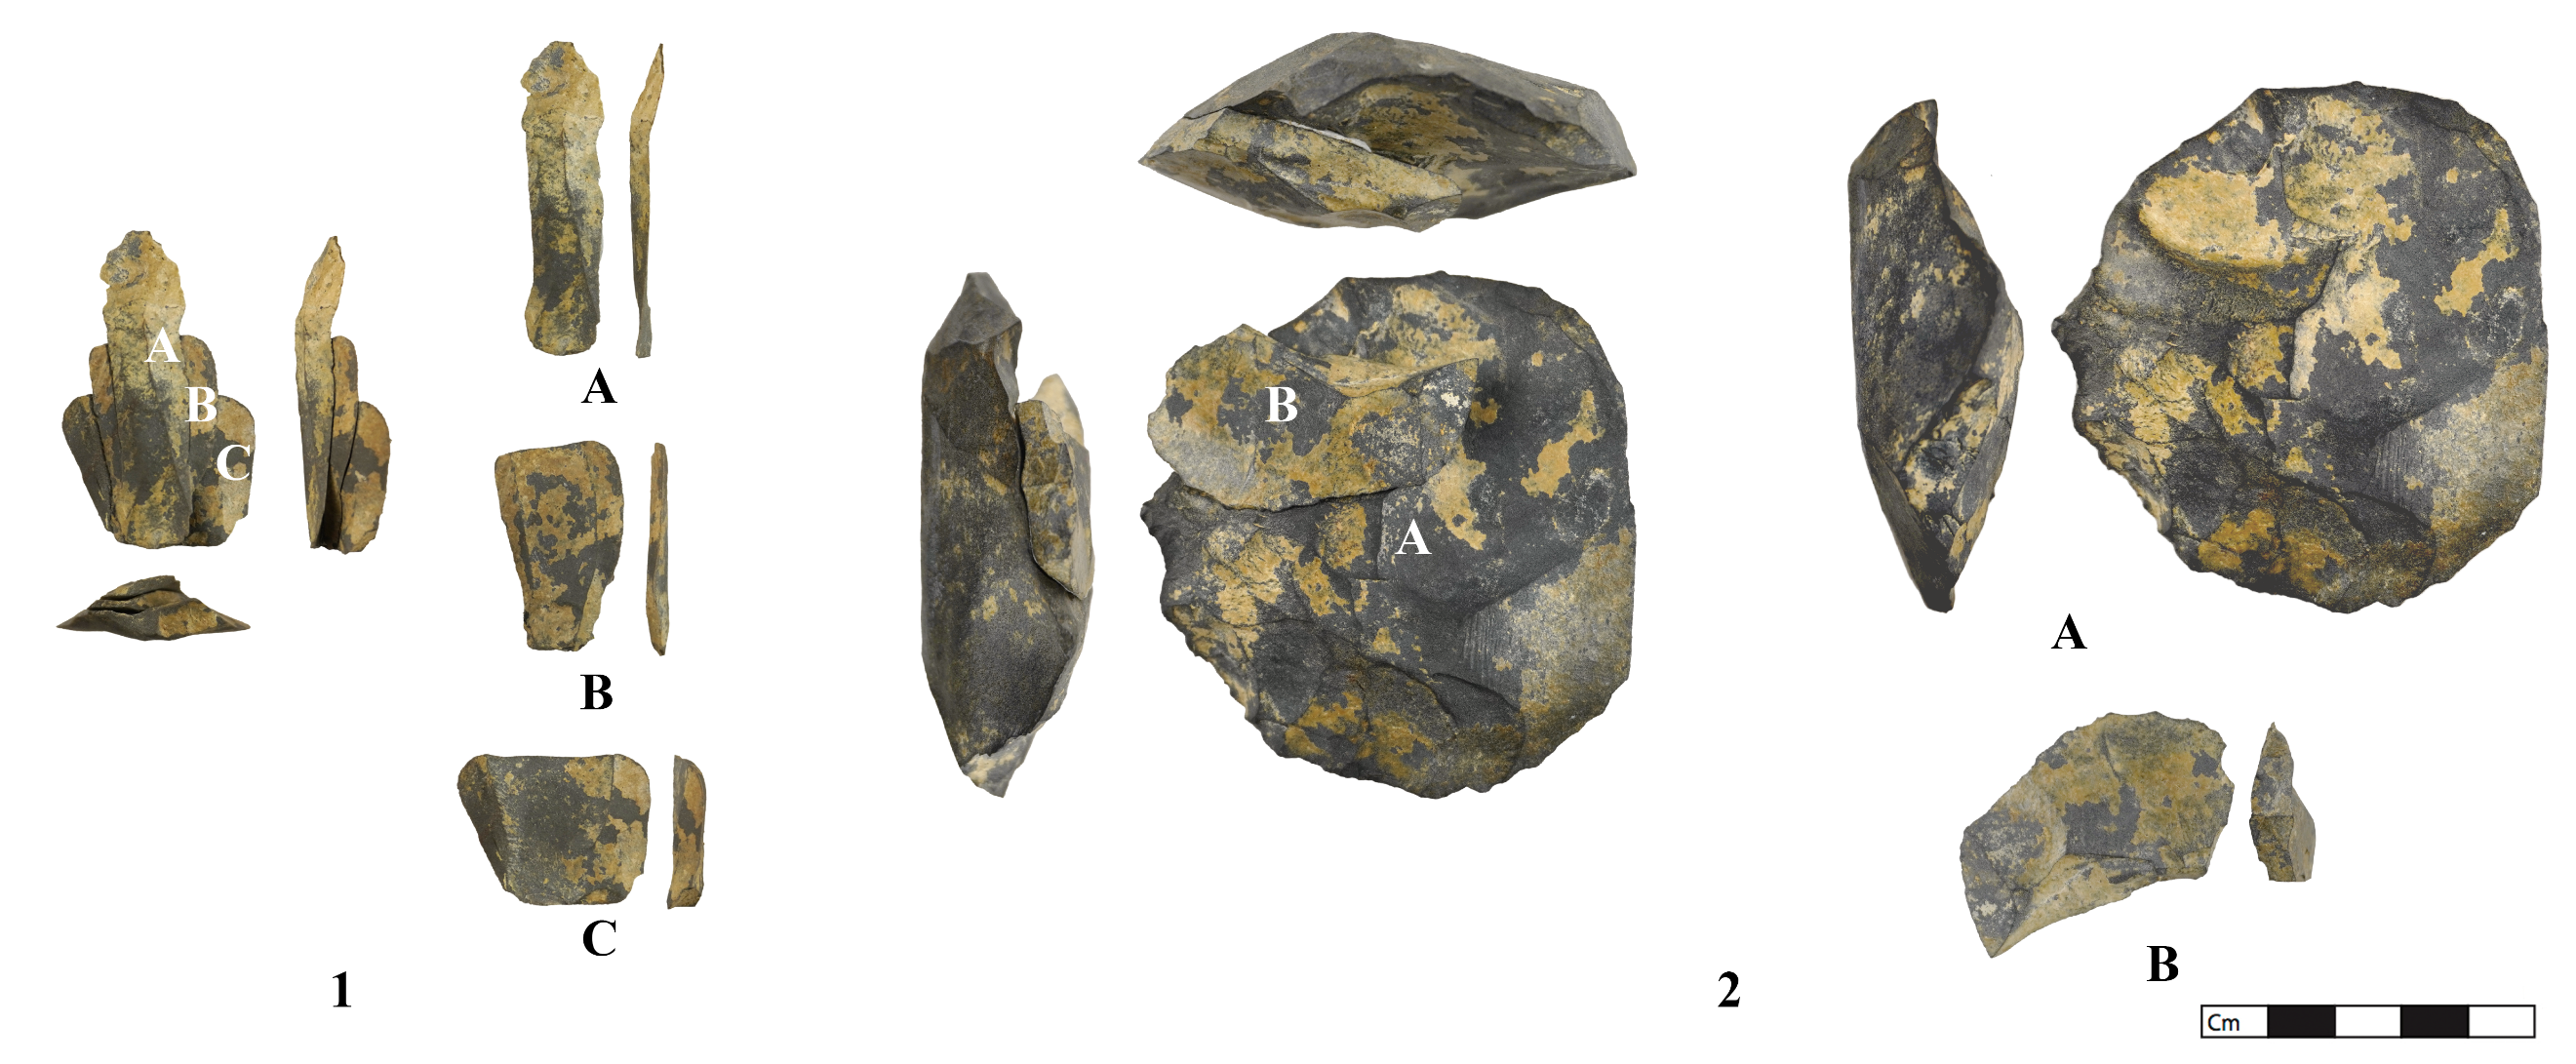


***Fig S6***

*(1) RG 18 ((A) Inv. No. 655, blade (B6) with partial cortical edge; (B) Inv. No 654, flake with distal hinge termination; (C) Inv. No. 653, flake with distal hinge termination)*

*(2) RG 19 ((A) Inv. No. 762, Levallois core; (B) Inv. No. 763, distal débordant flake fragment)*

Complementing the eleven production sequences among the sampled assemblage, nine breaks of various origins were identified (Fig. S7-S8). They generally consist of two artifact pieces that either disintegrated during the knapping process or were split into fragments by not further specifiable taphonomical processes such as sediment pressure or trampling. As the previously presented production sequences, the elements of the breaks were often discovered not only within the same or the neighboring transect but spanning distances of up to 30 cm within the excavation areas and originate mainly from the center of the feature with the highest artifact densities. Distinct illustrations of breaks are found, for example, in the distal or medial and proximal parts of blades from the main production phase (e.g., a B7 blade of RG 3, Fig. S7 no. 1, and a B1 blade of RG 5, Fig. S7 no. 2). Due to their primarily non-cortical dorsal faces and techno-typological assignment, blades of these dimensions are assumed to originate within the main production phase of blanks and, therefore, are considered preferential products.

The only case of a broken tool in which two fragments could be identified and conjoined is RG 8, represented by its proximal and distal parts (Inv. No. 333 and 334, Fig. S7 no. 4). It is a blade produced during the optimal phase of debitage that does not carry any cortical surfaces and is characterized by three unidirectional negatives on its dorsal face. Its’ for this assemblage scarce feature of bearing a small notch on its right lateral edge furthermore classifies it as a tool that underwent further modifications beyond the blank production. However, as the medial break of the artifact cannot be directly correlated with any task-specific use or function-related modifications, it is nevertheless classified as a broken artifact. Strikingly, it is one of the few pieces from the laminar debitage that can be associated with the preferential products of the main production phase and was potentially discarded with the assemblage due to its break, as the edges do not appear to bear evidence of prolonged use.


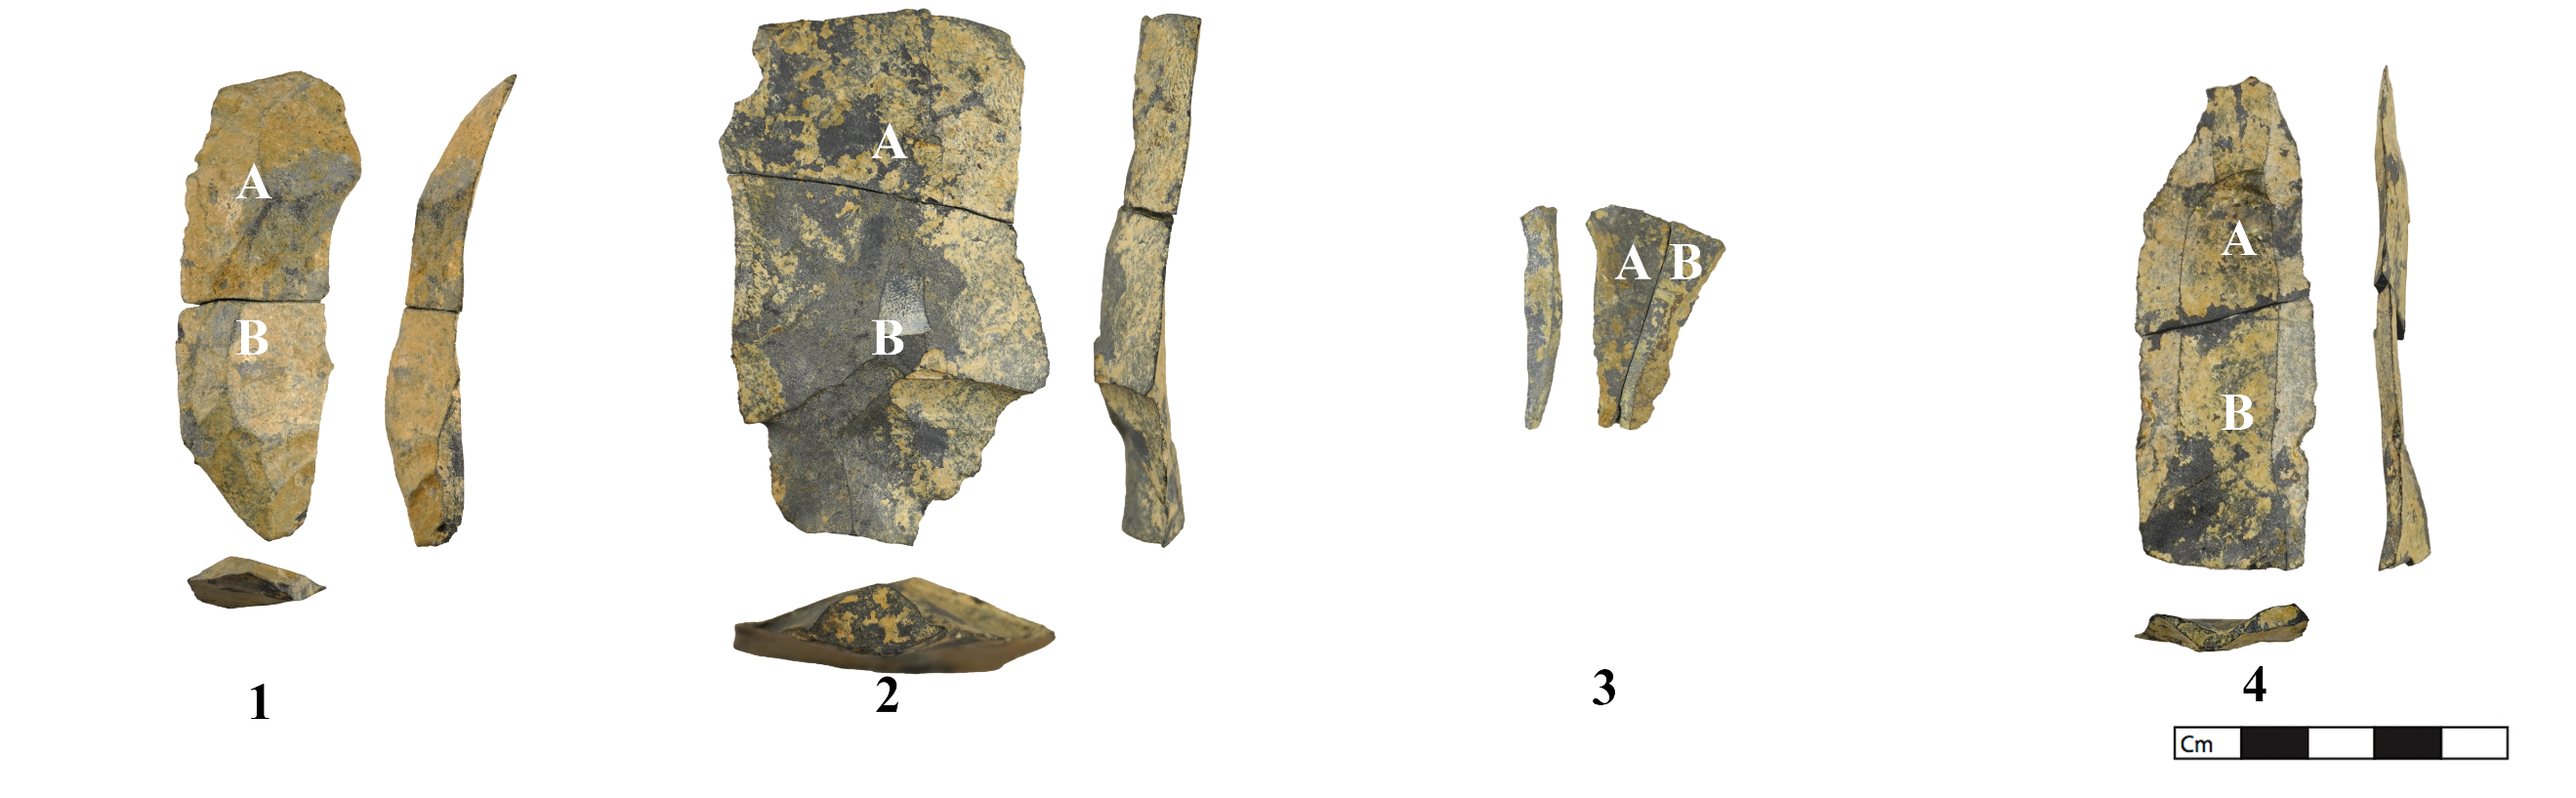


***Fig S7***

*(1) RG 3 ((A) Inv. No. 142, (B) Inv. No. 142, proximal and distal fragment, blade with steep cortical back (B7)*

*(2) RG 5 ((A) Inv. No 774, (B) Inv. No. 247, proximal and medial fragment, blade (B1), main production phase)*

*(3) RG 17 ((A) Inv. No. 651, (B) Inv. No. 652, left and right lateral fragments of a siret broken flake)*

*4 – RG 8 ((A) Inv. No. 333, (B) Inv. No. 334, proximal and distal fragment, blade (B1) from main production phase)*

Further examples from the category of broken artifacts are the specimens of RG 17, which is here explicitly noted since the two lateral flake fragments (Inv. No. 651 and 652, Fig. S7 no. 3) originate from the same excavation unit and neighboring transects (80–90 cm and 90–100 cm, Outer) and document the occurrence of knapping accidents, in this case a siret fracture along the axis of striking direction of the artifact. The unintentional snapping of the flake with three converging dorsal negatives and a triangular morphology is possibly related to applying a too-strong force from a steep knapping angle or a material failure during the main production phase. The close spatial position of the two discovered fragments in the same archaeological context that were originally detached during the same knapping action thereby argues for discarding debitage waste at the place of action. It embraces further the high unlikelihood of taphonomical dislocation.


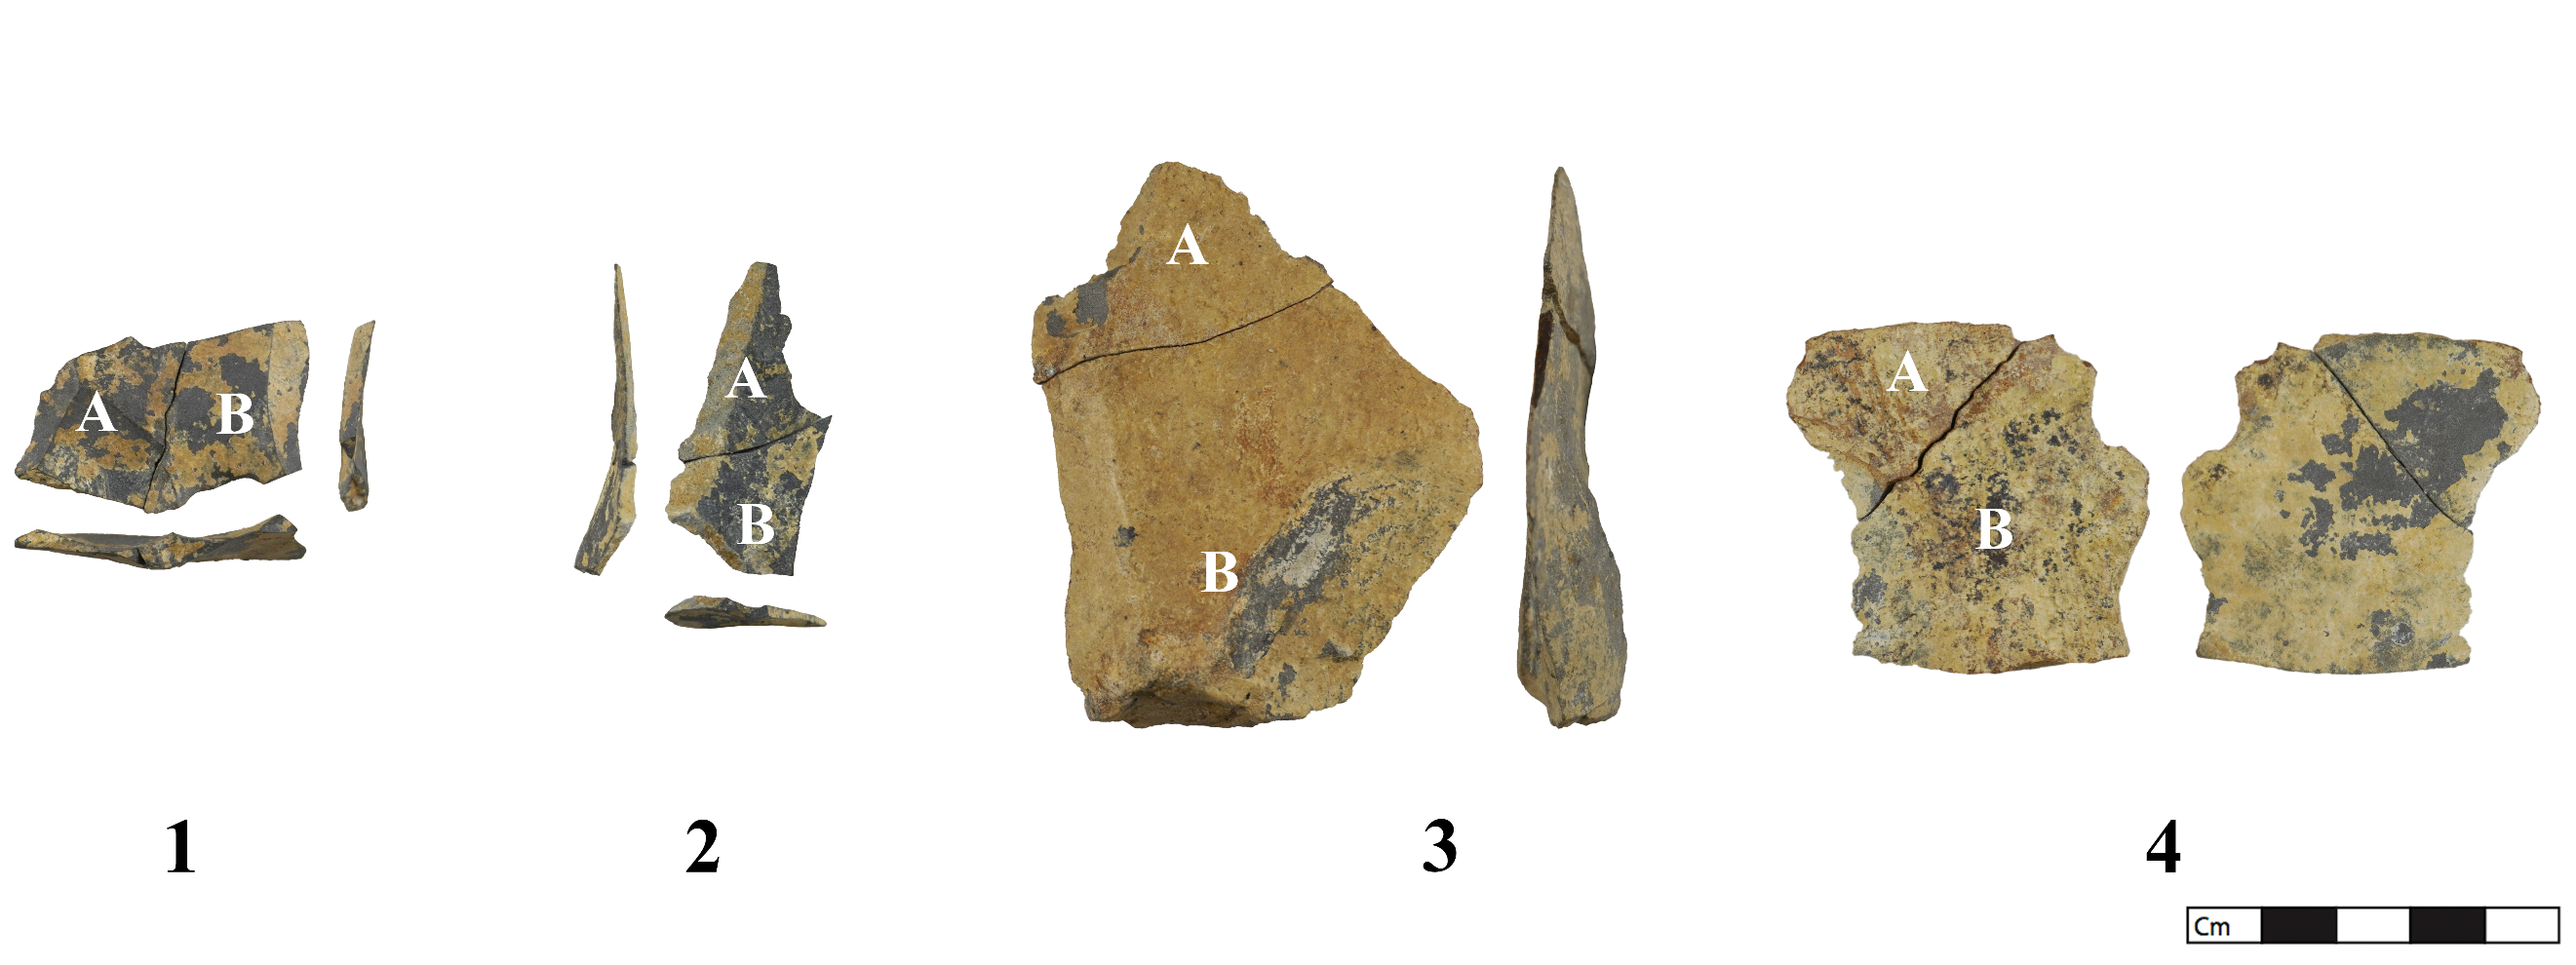


***Fig S8***

*(1) RG 9 ((A) Inv. No. 394, (B) Inv. No. 394, left and right lateral fragments of a siret broken flake)*

*(2) RG 13 ((A) Inv. No 551, (B) Inv. No. 548, proximal and distal flake fragments)*

*(3) RG 16 ((A) Inv. No. 625, (B) Inv. No. 624, proximal and distal cortical flake fragments)*

*(4) RG 20 ((A) Inv. No. 793, (B) Inv. No. 796, distal and medial cortical flake fragments)*

The remaining refit groups (RG 9, 13, 16, and 20) primarily represent sets of two broken artifacts whose conjoining could be well identified by their heterogeneous cortical morphologies that could be documented on the dorsal faces (Fig. S8 nos. 2-4). In most of these cases, the breaks occurred between the distal and the medial or proximal-medial fragment of the artifacts but in single cases as well exhibit further knapping accidents such as siret fractures (e.g., Fig. S8 no. 1).
