# Supplementary material for: Revisited and revalorized: Technological and refitting studies at the Middle Stone Age open-air knapping site Jojosi 1 (KwaZulu-Natal, South Africa)
Source: Research Square preprint supplement (doi:10.21203/rs.3.rs-4915370/v1), 2024-09-12
Supplement: Supplementary file 9 [file e4534c101064e2d0de243c73.xlsx]

## Sheet: Tabelle1
Sample ID	Depth [m]	U [ppm]	Th [ppm]	K [%]	Internal K [%]	Environmental dose rate [Gy ka-1]	n (aliquots accepted)	BayLum dose [Gy]	BayLum 1σ dose range [Gy]	BayLum age [ka]	BayLum 1σ age range [ka]
JOJO-1-1	3.65	0.48 ± 0.04	2.66 ± 0.19	0.30 ± 0.01	0.74 ± 0.06	0.74 ± 0.03	30	112	101 - 119	156	141 - 166
JOJO-1-2	2	0.42 ± 0.03	2.48 ± 0.18	0.29 ± 0.01	0.76 ± 0.13	0.74 ± 0.03	35	96	93.8 – 99.05	132	121 - 139
JOJO-1-3	0.65	0.46 ± 0.03	2.65 ± 0.19	0.28 ± 0.01	0.9 ± 0.02	0.81 ± 0.03	28	89.5	85.3 – 91.3	111	106 - 117
